# Supplementary material for: Ultra high adsorption capacity of fried egg jellyfish-like γ-AlOOH(Boehmite)@SiO2/Fe3O4 porous magnetic microspheres for aqueous Pb(II) removal
Source: Royal Society of Chemistry journal article supplement (doi:10.1039/c1jm12196k), 2011-01-01
Supplement: c1jm12196k.pdf [file c1jm12196k.pdf]

Supporting Information for “Ultra high adsorption capacity of fried egg  
jellyfish-like  $\gamma$ -AlOOH(Boehmite)@SiO<sub>2</sub>/Fe<sub>3</sub>O<sub>4</sub> porous magnetic microspheres  
for aqueous Pb(II) removal”

**Table S1** physical properties of the different samples

| Samples                                                                    | BET (m <sup>2</sup> g <sup>-1</sup> ) | Average Pore Diameter (nm) | Pore Volume (cm <sup>3</sup> g <sup>-1</sup> ) |
|----------------------------------------------------------------------------|---------------------------------------|----------------------------|------------------------------------------------|
| Fe <sub>3</sub> O <sub>4</sub>                                             | 6.9633                                | 19.3082                    | 0.0336                                         |
| SiO <sub>2</sub> /Fe <sub>3</sub> O <sub>4</sub>                           | 6.9380                                | 2.9320                     | 0.0051                                         |
| $\gamma$ -AlOOH(Boehmite)@SiO <sub>2</sub> /Fe <sub>3</sub> O <sub>4</sub> | 28.5980                               | 10.2883                    | 0.0736                                         |

**Table S2** Impact of the different concentrations of the reactants for the formation of fried egg jellyfish-like  $\gamma$ -AlOOH(Boehmite)@SiO<sub>2</sub>/Fe<sub>3</sub>O<sub>4</sub> microspheres.

| Samples                                                                             | 1   | 2    | 3    | 4    |
|-------------------------------------------------------------------------------------|-----|------|------|------|
| SiO <sub>2</sub> /Fe <sub>3</sub> O <sub>4</sub> concentration (g L <sup>-1</sup> ) | 2.8 | 2.8  | 2.8  | 2.8  |
| NaAlO <sub>2</sub> concentration (g L <sup>-1</sup> )                               | 3.4 | 6.8  | 10.2 | 13.6 |
| NH <sub>2</sub> CONH <sub>2</sub> concentration (g L <sup>-1</sup> )                | 9.6 | 19.2 | 28.8 | 38.4 |

**Table S3** Langmuir isotherm parameters for aqueous Pb(II) adsorption by fried egg jellyfish-like  $\gamma$ -AlOOH(Boehmite)@SiO<sub>2</sub>/Fe<sub>3</sub>O<sub>4</sub> microspheres.

| Samples                                                                    | Pb(II)                               |                                      |                |
|----------------------------------------------------------------------------|--------------------------------------|--------------------------------------|----------------|
|                                                                            | q <sub>m</sub> (mg g <sup>-1</sup> ) | K <sub>L</sub> (L mg <sup>-1</sup> ) | r <sup>2</sup> |
| Fe <sub>3</sub> O <sub>4</sub>                                             | 6.21                                 | 0.188                                | 0.9962         |
| SiO <sub>2</sub> /Fe <sub>3</sub> O <sub>4</sub>                           | 18.32                                | 0.914                                | 0.9985         |
| $\gamma$ -AlOOH(Boehmite)@SiO <sub>2</sub> /Fe <sub>3</sub> O <sub>4</sub> | 214.59                               | 0.525                                | 0.9987         |

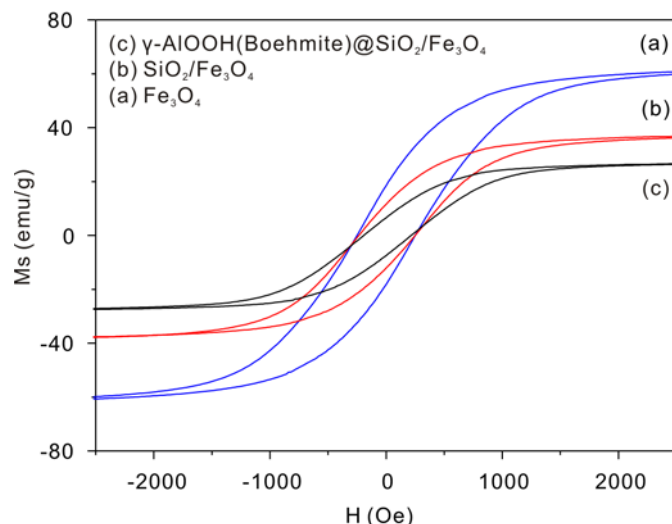

**Fig. S1** The enlarged view of the central magnetic hysteresis loops of (a) Fe<sub>3</sub>O<sub>4</sub> microspheres, (b) SiO<sub>2</sub>/Fe<sub>3</sub>O<sub>4</sub> microspheres, and (c) fried egg jellyfish-like  $\gamma$ -AlOOH(Boehmite)@SiO<sub>2</sub>/Fe<sub>3</sub>O<sub>4</sub> microspheres.

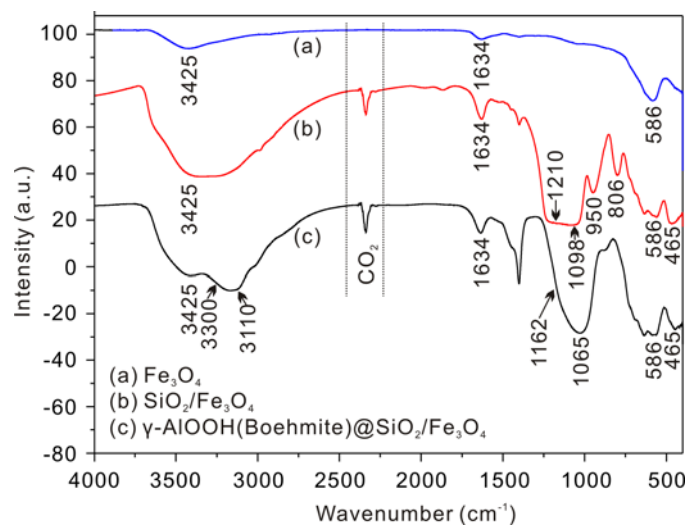

**Fig. S2** FTIR spectra of (a) Fe<sub>3</sub>O<sub>4</sub> microspheres (b) SiO<sub>2</sub>/Fe<sub>3</sub>O<sub>4</sub> microspheres, and (c) fried egg jellyfish-like  $\gamma$ -AlOOH(Boehmite)@SiO<sub>2</sub>/Fe<sub>3</sub>O<sub>4</sub> microspheres.

The FTIR spectra of Fe<sub>3</sub>O<sub>4</sub>, SiO<sub>2</sub>/Fe<sub>3</sub>O<sub>4</sub>, and fried egg jellyfish-like  $\gamma$ -AlOOH(Boehmite)@SiO<sub>2</sub>/Fe<sub>3</sub>O<sub>4</sub> magnetic microspheres are compared in Figure S3, which are performed for a better comprehension of the structure and composition of these materials. The analysis indicated the shoulder at 3425 cm<sup>-1</sup> and the weak band at 1634 cm<sup>-1</sup> can be assigned to the stretching and bending modes of the adsorbed water, respectively.<sup>[1]</sup> The absorption centered at 586 cm<sup>-1</sup> corresponding to the Fe-O vibration related to the magnetite phase.<sup>[2-3]</sup> For SiO<sub>2</sub>/Fe<sub>3</sub>O<sub>4</sub> magnetic microspheres, the absorption bands at 1210, 1098, 950, 806, and 465 cm<sup>-1</sup> observed can be ascribed

to the stretching and deformation vibrations of  $\text{SiO}_2$ , reflecting the coating of silica on the surface of  $\text{Fe}_3\text{O}_4$  microspheres. For fried egg jellyfish-like  $\gamma\text{-AlOOH(Boehmite)}@\text{SiO}_2/\text{Fe}_3\text{O}_4$  microspheres, the bands at  $3300$  and  $3110\text{ cm}^{-1}$  belong to the  $\nu_{\text{as}}(\text{Al})\text{O-H}$  and  $\nu_{\text{s}}(\text{Al})\text{-H}$  stretching vibrations, respectively<sup>[4]</sup>. However, the two peaks of the as-prepared sample which were concealed by the peak of adsorbed water were not easily discerned. The bands at  $1065$  and  $1162\text{ cm}^{-1}$  are, respectively, attributed to the  $\nu_{\text{sym}}\text{ Al-O-H}$  and  $\nu_{\text{asym}}\text{ Al-O-H}$  modes of  $\gamma\text{-AlOOH}$  (Boehmite)<sup>[5]</sup>. These results suggest that the surface of  $\text{SiO}_2/\text{Fe}_3\text{O}_4$  microsphere has been covered by  $\gamma\text{-AlOOH}$ (Boehmite).

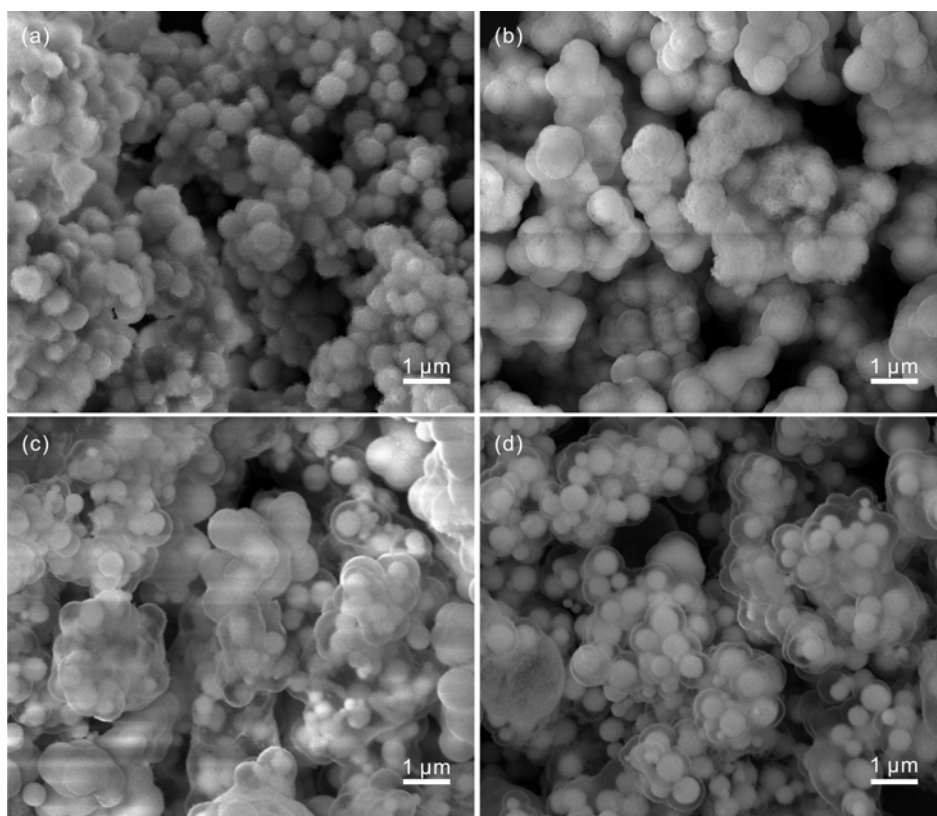

**Fig. S3** SEM images of products obtained from the difference of the reactant concentrations at  $160\text{ °C}$  for 12 h. (a) Sample 1. (b) Sample 2. (c) Sample 3. (d) Sample 4. The values of the reactant concentrations corresponding to these samples were shown in Table 1.

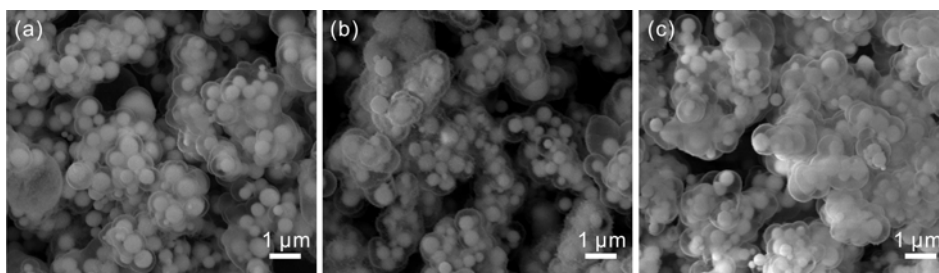

**Fig. S4** SEM images of products obtained from the different reaction temperature for 12 h. (a) 160 °C. (b) 180 °C. (c) 200 °C.

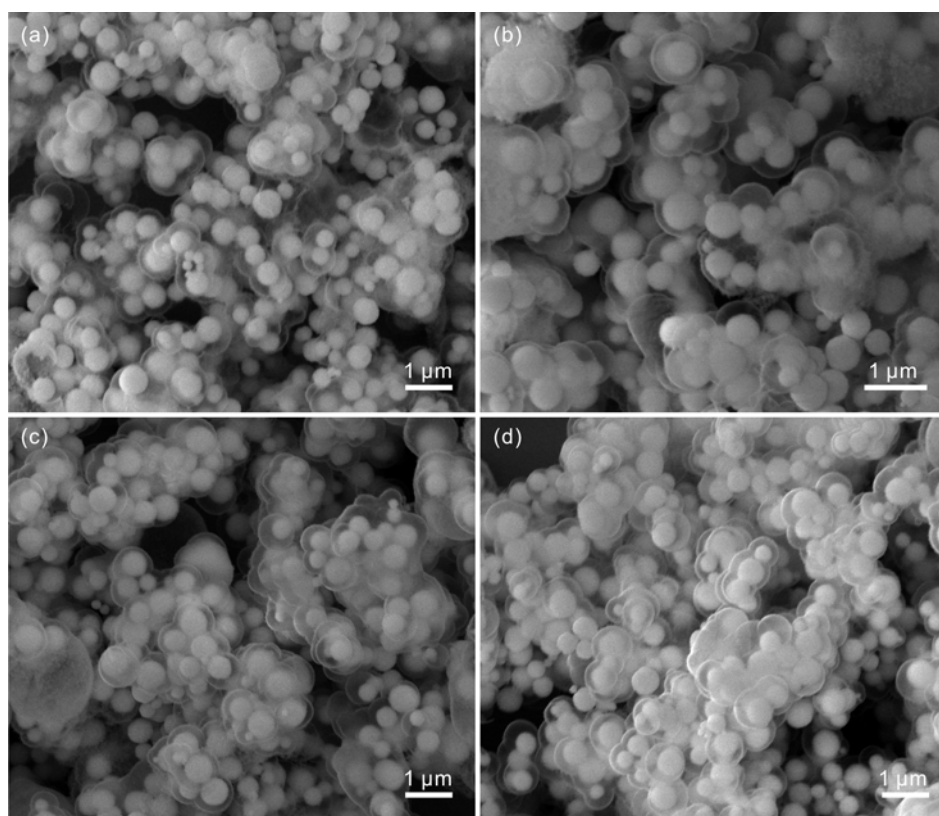

**Fig. S5** SEM images of products obtained from the different reaction times at 160 °C. (a) 1 h. (b) 6 h. (c) 12 h. (d) 18 h.

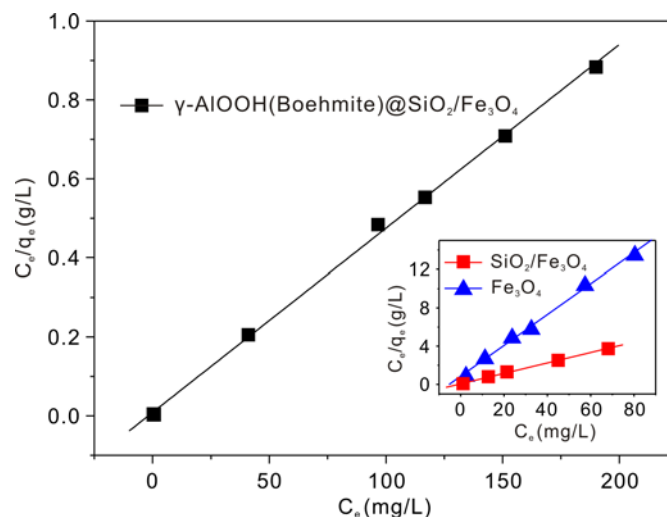

**Fig. S6** Langmuir isotherms of Pb(II) onto fried egg jellyfish-like  $\gamma\text{-AlOOH(Boehmite)}@\text{SiO}_2/\text{Fe}_3\text{O}_4$  microspheres. Inset: Langmuir isotherms of Pb(II) onto  $\text{Fe}_3\text{O}_4$  microspheres and  $\text{SiO}_2/\text{Fe}_3\text{O}_4$  microspheres. Adsorbent dose =  $1 \text{ g L}^{-1}$ , shaking rate = 100 rpm, contact time = 24 h,  $T = 298 \text{ K}$ ,  $\text{pH} = 5$ .

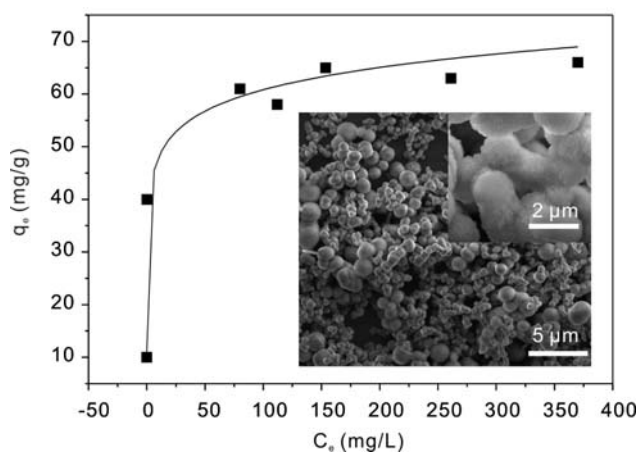

**Fig.S7** Adsorption isotherm of boehmite particles (without  $\text{SiO}_2/\text{Fe}_3\text{O}_4$  microspheres) for aqueous Pb(II). The inset is SEM of boehmite particles. Adsorbent dose =  $1 \text{ g L}^{-1}$ , shaking rate = 100 rpm, contact time = 24 h,  $T = 298 \text{ K}$ , and  $\text{pH} = 5$ .

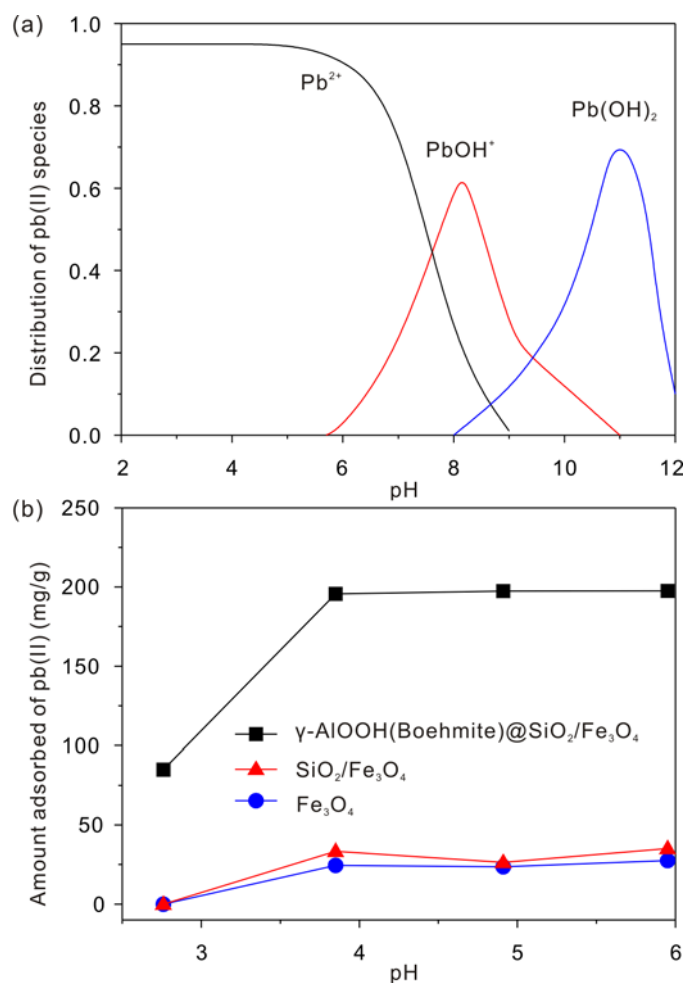

**Fig. S8** (a) Speciation diagram of lead as a function of pH. (b) Effect of pH on Pb(II) adsorption onto Fe<sub>3</sub>O<sub>4</sub> microspheres, SiO<sub>2</sub>/Fe<sub>3</sub>O<sub>4</sub> microspheres, and fried egg jellyfish-like  $\gamma$ -AlOOH(Boehmite)@SiO<sub>2</sub>/Fe<sub>3</sub>O<sub>4</sub> microspheres. Initial Pb(II) concentration: 240 mg L<sup>-1</sup>, adsorbent dose: 1 g L<sup>-1</sup>, shaking rate: 100 rpm, contact time: 24 h, and T = 298 K.

## References

- [1] C. L. Lu, J. G. Lv, L. Xu, X. F. Guo, W. H. Hou, Y. Hu, H. Huang, *Nanotechnology* **2009**, *20*.
- [2] Q. Gao, F. H. Chen, J. L. Zhang, G. Y. Hong, J. Z. Ni, X. Wei, D. J. Wang, *J. Magn. Magn. Mater.* **2009**, *321*, 1052.
- [3] M. Yamaura, R. L. Camilo, L. C. Sampaio, M. A. Macedo, M. Nakamura, H. E. Toma, *J. Magn. Magn. Mater.* **2004**, *279*, 210.
- [4] X. Y. Chen, H. S. Huh, S. W. Lee, *Nanotechnology* **2007**, *18*.
- [5] Y. L. Feng, W. C. Lu, L. M. Zhang, X. H. Bao, B. H. Yue, Y. Iv, X. F. Shang, *Cryst. Growth Des.* **2008**, *8*, 1426.
